# Supplementary material
Source: PubMed Central journal article supplement (PMC519152)
Supplement: mbc_E04-04-0324_2.pdf [file mbc_E04-04-0324_2.pdf]

## **Online Supplemental Material**

### **BrdU-labelling**

Newborn mice were injected with 50 µg BrdU in 0.9%NaCl per gram bodyweight intraperitoneally (Sigma) 2 or 24h before they were sacrificed. Skin was processed to cyrosections and BrdU-incorporation visualized by indirect immunofluorescence using the BrdU-detection kit I (Roche) following manufacture's instructions.

### **Calcein dye-coupling analysis**

Assay for heterotypic coupling was carried out as described by Goldberg et al. (1995) by staining one cell type with Dil (5 µM in PBS with 0.2% glucose) and calcein AM (5 µM in PBS with 0.2% glucose) and co-cultivated with a 1000-fold excess of unstained cells. Calcein (C-3100, Molecular Probes) is able to pass through gap junctions, while Dil (C-7000, Molecular Probes) is not and acts as a permanent membrane dye to identify donor cells. The number of cells receiving calcein from each preloaded cell can then be quantified after the cells settle on the plate.

### **Echocardiography analysis**

For echocardiographic examination, mice were anesthetized with Sevoflourane, M- and B-mode recordings of the left ventricle were obtained at the level of the papillary muscles from a parasternal window using a HDI-5000 equipped with a 15-MHz probe.
